# Supplementary material for: The Impact of Psychological Safety and Perceived Organizational Support on Burnout Among Primary and Secondary School PE Teachers
Source: Research Square preprint supplement (doi:10.21203/rs.3.rs-5465493/v1), 2025-04-16
Supplement: Supplementary file 1 [file dde9dc4b3f2ee54656f69a6d.docx]

**Common Method Bias Test Results**
Since the student data were all collected through self-reports from participants, there is an unavoidable issue of common method bias (Williams et al., 2016). Harman’s single-factor test was employed to conduct an exploratory factor analysis on all items from the five questionnaires, using unrotated principal component analysis. The results revealed 16 factors with eigenvalues greater than 1, and the first factor explained 33.96% of the variance (which is below the critical threshold of 40%). By packaging the top three factor loadings of each scale into corresponding latent variable indicators, we applied the latent error variable control method. Before accounting for common method bias, the model fit indices were: *χ²* = 321.04, *CFI* = 0.95, *TLI* = 0.95, *RMSEA* = 0.04, *SRMR* = 0.04. After introducing the common method bias factor, the fit indices were: *χ²* = 267.58, *CFI* = 0.94, *TLI* = 0.98, *RMSEA* = 0.03, *SRMR* = 0.05. The minimal difference between these results suggests that there is no significant common method bias.

|  | **PS** | **POS** | **DA** | **Mindfulness** | **Burnout** |
| --- | --- | --- | --- | --- | --- |
| PS | 1 |  |  |  |  |
| POS | .507** | 1 |  |  |  |
| DA | .324** | .407** | 1 |  |  |
| Mindfulness | .244** | .319** | .736** | 1 |  |
| Burnout | -.566** | -.635** | -.506** | -.496** | 1 |
| *M ± SD* | 4.847±1.150 | 3.556±0.689 | 2.811±0.460 | 4.432±0.888 | 2.509±0.561 |

**Table** S1Descriptive and Correlational Results. ****p* < 0.001, ***p* < 0.01,**p* < 0.05. PS-psychological safety; POS-perceived organizational support; DA-deep acting.

**References**

Williams, L. J. & McGonagle, A. K. Four research designs and a comprehensive analysis strategy for investigating common method variance with self-report measures using latent variables. J. Bus. Psychol. **31**, 339–359 (2016). [https://doi.org/10.1007/s10869-015-9422-9](https://doi.org/10.1007/s10869-015-9422-9" \t "_new)
